# Supplementary material for: Achromobacter spp. Surgical Site Infections: A Systematic Review of Case Reports and Case Series
Source: MDPI journal article supplement (doi:10.3390/microorganisms9122471), 2021-11-30
Supplement: s1 [file s1]

## Supplementary file 1: Detailed search strategy

| Source                                        | Algorithms                                                                                                                                                                                                                                                                                                               | Total number of records found | Records removed before screening | Records excluded on title and abstracts | Records not retrieved | Records excluded after full-text reading | Records included in the study |
|-----------------------------------------------|--------------------------------------------------------------------------------------------------------------------------------------------------------------------------------------------------------------------------------------------------------------------------------------------------------------------------|-------------------------------|----------------------------------|-----------------------------------------|-----------------------|------------------------------------------|-------------------------------|
| MEDLINE database                              | ((achromobacter) OR (alcaligenes xylosoxidans)) AND (healthcare-associated-infection OR nosocomial-infection OR surgery OR surgical-site-infection OR ventriculitis OR meningitis OR bacteraemia OR mediastinitis OR abscess OR peritonitis OR endocarditis OR burns) Filters: English, French, Humans, from 1961 - 2020 | 240                           | 0                                | 173                                     | 9                     | 36                                       | 22                            |
| Cochrane Library database                     | "Achromobacter" in All Text OR "Alcaligenes xylosoxidans" in All Text - (Word variations have been searched)                                                                                                                                                                                                             | 17                            | 0                                | 17                                      | 0                     | 0                                        | 0                             |
| Clinicaltrials.gov registry                   | "Achromobacter OR alcaligenes xylosoxidans"                                                                                                                                                                                                                                                                              | 8                             | 1                                | 7                                       | 0                     | 0                                        | 0                             |
| Google scholar.fr website (French language)   | Achromobacter , chirurgie, infection                                                                                                                                                                                                                                                                                     | 132                           | 0                                | 129                                     | 0                     | 3                                        | 0                             |
| Google scholar.com website (English language) | Achromobacter, surgery, infection                                                                                                                                                                                                                                                                                        | 383                           | 159                              | 204                                     | 0                     | 12                                       | 10                            |
| Theses.fr website                             | Achromobacter, chirurgie, infection                                                                                                                                                                                                                                                                                      | 21                            | 10                               | 9                                       | 0                     | 2                                        | 0                             |
| CPIAS-ile-de-France.fr website                | Achromobacter                                                                                                                                                                                                                                                                                                            | 1                             | 0                                | 0                                       | 0                     | 0                                        | 1                             |
| esin.santepubliquefrance.fr, website          | Achromobacter                                                                                                                                                                                                                                                                                                            | 10                            | 0                                | 9                                       | 1                     | 0                                        | 0                             |
| Manual citation searching                     | -                                                                                                                                                                                                                                                                                                                        | 8                             | 0                                | 0                                       | 0                     | 4                                        | 4                             |

Supplementary file 1: Detailed search strategy
